# Supplementary material for: Patient safety after implementation of a coproduced family centered communication programme: multicenter before and after intervention study
Source: PubMed Central journal article supplement — BMJ. 2018 Dec 5;363:k4764. doi: 10.1136/bmj.k4764 (PMC6278585; doi:10.1136/bmj.k4764), 2018-12-05
Supplement: khaa045957.ww1.pdf [file khaa045957.ww1.pdf]

## Supplementary Appendix

Supplement to: Khan A, Spector ND, Baird JD, for the Patient and Family Centered I-PASS Study Group. Patient safety before and after implementation of a co-produced family-centered communication program: a multicenter pre-post intervention study. *The BMJ*. 2018.  
doi:10.1136/bmj.k4764

### CONTENTS

|                                                                                                                                                                                                                    |    |
|--------------------------------------------------------------------------------------------------------------------------------------------------------------------------------------------------------------------|----|
| Supplementary Table 1. Medical Errors and Adverse Events Before and After Implementation of Patient and Family Centered I-PASS <i>Excluding Incidents Uniquely Captured through Family Safety Interviews</i> ..... | S2 |
| Supplementary Figure 1. Medical Errors and Adverse Events.....                                                                                                                                                     | S3 |
| Supplementary Figure 2. Participant Flow by Type for Prospective Multicenter Intervention Study, 2014-2017 .....                                                                                                   | S4 |

**Supplementary Table 1. Medical Errors and Adverse Events Before and After Implementation of Patient and Family Centered I-PASS Excluding Incidents Uniquely Captured through Family Safety Interviews**

| Incident Type                             | Before Implementation<br>(n=1574) |                            | After Implementation<br>(n=1532) |                            | P value      |
|-------------------------------------------|-----------------------------------|----------------------------|----------------------------------|----------------------------|--------------|
|                                           | No <sup>a</sup>                   | Rate <sup>b</sup> (95% CI) | No <sup>a</sup>                  | Rate <sup>b</sup> (95% CI) |              |
| Overall medical errors                    | 229                               | 36.4 (26.9 to 49.1)        | 215                              | 31.4 (23.1 to 42.8)        | 0.22         |
| Non-harmful errors                        | 122                               | 17.4 (11.0 to 27.4)        | 147                              | 19.7 (13.1 to 29.6)        | 0.44         |
| Harmful errors/Preventable adverse events | 107                               | 18.3 (13.3 to 25.3)        | 68                               | 10.7 (7.2 to 16.1)         | <b>0.01</b>  |
| Non-preventable adverse events            | 69                                | 12.2 (8.5 to 17.4)         | 30                               | 5.0 (3.0 to 8.6)           | <b>0.003</b> |

Abbreviation: <sup>a</sup>Number of incidents; <sup>b</sup>Per 1000 patient-days

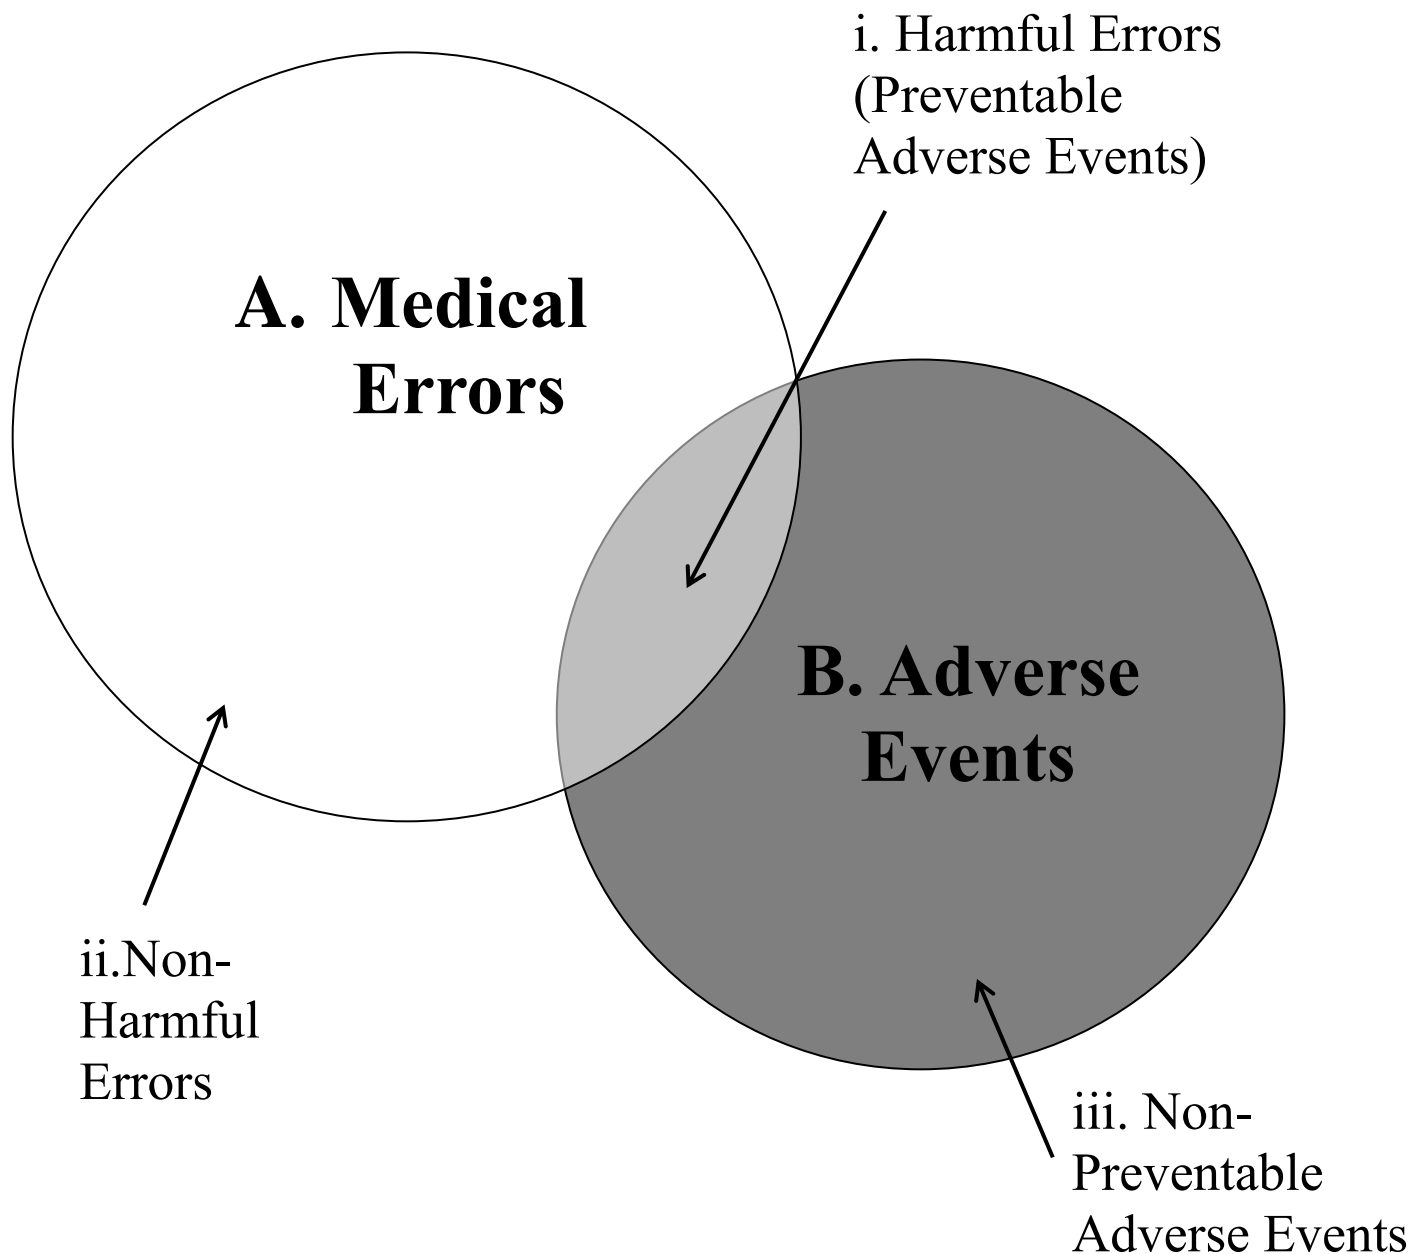

**Supplementary Figure 1. Medical Errors and Adverse Events**

- A. Medical errors are defined as failures in care processes (e.g., administering penicillin to patient with known penicillin allergy). These include those that lead to (i) harm [harmful error; also known as preventable adverse event] or (ii) no harm [nonharmful error]. Thus, medical errors represent the sum of both the subset of harmful errors (i) (also known as preventable adverse events; gray overlapping region) and non-harmful errors (ii).
- B. Adverse events are defined as harms to patients due to medical care (e.g., anaphylaxis after receiving penicillin). These include those that are (i) due to a medical error (e.g., anaphylaxis after receiving penicillin in a patient with a known penicillin allergy) [preventable adverse event] or (iii) not due to a medical error (e.g. anaphylaxis after receiving penicillin in a patient with no previously known drug allergies)[non-preventable adverse event]. Thus adverse events represent the sum of preventable adverse events (i.e., harmful errors; gray overlapping region, i) and non-preventable adverse events (iii). Adverse events that occur without clear precipitating medical errors were rated as non-preventable.

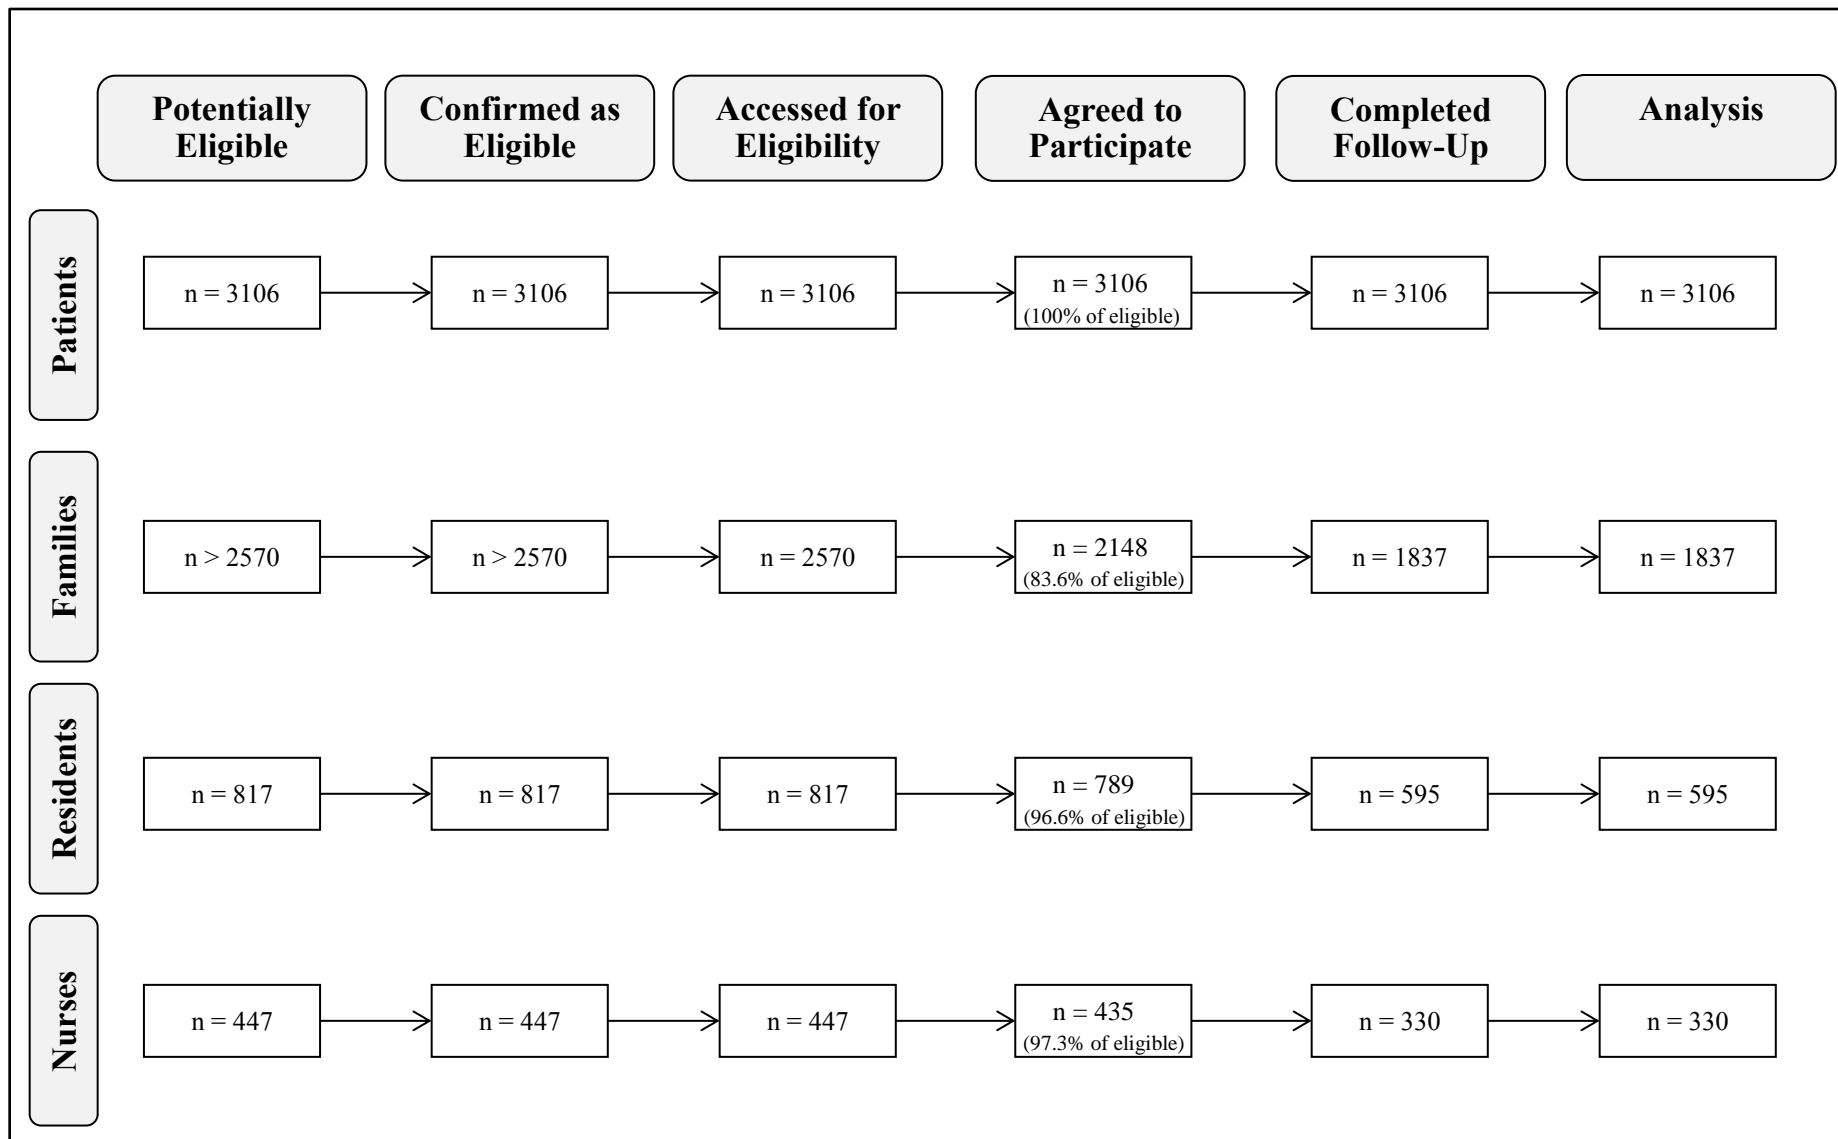

**Supplementary Figure 2. Participant Flow by Type for Prospective Multicenter Intervention Study, 2014-2017**
